# Supplementary material for: Meta-analysis of incidence and risk of severe adverse events and fatal adverse events with crizotinib monotherapy in patients with ALK-positive NSCLC
Source: PubMed Central journal article supplement (PMC5650427; doi:10.18632/oncotarget.18536), 2017-06-17
Supplement: oncotarget-08-75372-s001.pdf [file oncotarget-08-75372-s001.pdf]

# Meta-analysis of incidence and risk of severe adverse events and fatal adverse events with crizotinib monotherapy in patients with ALK-positive NSCLC

## Supplementary Materials

### Incidence of SAEs with chemotherapy

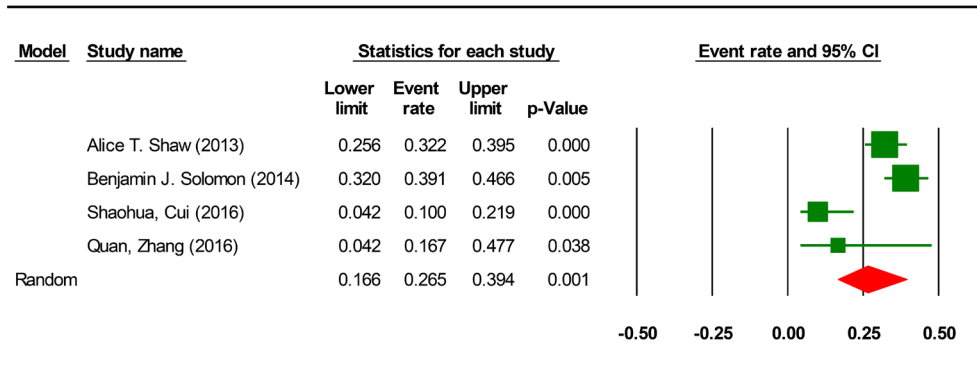

Supplementary Figure 1: Forest-plot of the overall incidence of chemotherapy-related severe adverse events.

**Supplementary Table 1: Risk of bias in randomized controlled trials**

| Study                    | Selection bias | Performance bias | Detection bias | Attrition bias | Reporting bias | Other bias |
|--------------------------|----------------|------------------|----------------|----------------|----------------|------------|
| Shaw, Alice T.[12]       | Unclear        | High             | High           | Low            | Low            | Low        |
| Benjamin J. Solomon [20] | Unclear        | High             | High           | Low            | Low            | Low        |

**Supplementary Table 2: Nine-point newcastle ottawa scale scores for non-randomized clinical trials**

| Study<br>(Reference)   | Selection<br>(Maximum of four stars)           |                                              |                              | Comparability<br>(Maximum of two stars)                                              |                                                                             | Outcome<br>(Maximum of three stars) |                                                                   |                                            |
|------------------------|------------------------------------------------|----------------------------------------------|------------------------------|--------------------------------------------------------------------------------------|-----------------------------------------------------------------------------|-------------------------------------|-------------------------------------------------------------------|--------------------------------------------|
|                        | Representativeness<br>of the exposed<br>cohort | Selection<br>of the non<br>exposed<br>cohort | Ascertainment<br>of exposure | Demonstration<br>that outcome<br>of interest was<br>not present at<br>start of study | Comparability<br>of cohorts on<br>the basis of<br>the design or<br>analysis | Assessment<br>of outcome            | Was<br>follow-<br>up long<br>enough<br>for<br>outcome<br>to occur | Adequacy<br>of follow-<br>up of<br>cohorts |
| Camidge D [6]          | *                                              |                                              | *                            | *                                                                                    |                                                                             | *                                   | *                                                                 | *                                          |
| Yabing, Cao [19]       | *                                              |                                              | *                            | *                                                                                    |                                                                             | *                                   | *                                                                 | *                                          |
| Shaohua,Cui [21]       | *                                              |                                              | *                            | *                                                                                    |                                                                             | *                                   | *                                                                 | *                                          |
| Yan, Wang [23]         | *                                              |                                              | *                            | *                                                                                    |                                                                             | *                                   | *                                                                 | *                                          |
| Shaohua,Cui [24]       | *                                              | *                                            | *                            | *                                                                                    | **                                                                          | *                                   | *                                                                 | *                                          |
| Puyuan Xing [25]       | *                                              |                                              | *                            | *                                                                                    |                                                                             | *                                   | *                                                                 | *                                          |
| TatsuyaYoshida<br>[26] | *                                              |                                              | *                            | *                                                                                    |                                                                             | *                                   | *                                                                 | *                                          |
| Quan, Zhang [27]       | *                                              | *                                            | *                            | *                                                                                    | **                                                                          | *                                   | *                                                                 | *                                          |

A study can be awarded a maximum number of four stars for the selection domain, maximum of two stars for the comparability domain and maximum of three stars for the outcome domain.

**Supplementary Table 3: Details of safety assessment in the included studies**

| Study (Reference)        | Study design             | Safety assessment                                                                                                                                          | Inclusion factors                                                           | Grade criterion (CTCAE) |
|--------------------------|--------------------------|------------------------------------------------------------------------------------------------------------------------------------------------------------|-----------------------------------------------------------------------------|-------------------------|
| D Ross Camidge [6]       | prospective              | at least every 2 weeks for the first 8 weeks of treatment and at least every 4 weeks thereafter until cycle 10, when visits every 8 weeks were permissible | physical examination, documentation of adverse events, and laboratory tests | version 3.0             |
| Alice T. Shaw [12]       | prospective              | from the time the patient provided written informed consent until at least 28 days after the last dose of study drug                                       | physical examination, documentation of adverse events, laboratory studies   | version 4.0             |
| Yabing, Cao [19]         | retrospective {, #19573} | at least one treatment cycle                                                                                                                               | physical examination, vital signs, and laboratory studies                   | version 3.0             |
| Benjamin J. Solomon [20] | prospective              | from the first dose of study medication until 28 days after the last dose of study medication                                                              | physical examination, documentation of adverse events, laboratory studies   | version 4.0             |
| Shaohua, Cui [21]        | prospective              | at least twice in each treatment cycle                                                                                                                     | documentation of adverse events, ECG finding, and laboratory studies        | version 3.0             |
| PROFILE1005 [22]         | prospective              | NA                                                                                                                                                         | NA                                                                          | version 4.0             |
| Yan, Wang [23]           | retrospective            | NA                                                                                                                                                         | NA                                                                          | version 4.0             |
| Shaohua, Cui [24]        | retrospective            | at least twice per treatment cycle                                                                                                                         | documentation of adverse events, ECG finding, and laboratory studies        | version 3.0             |
| Puyuan Xing [25]         | retrospective            | NA                                                                                                                                                         | NA                                                                          | version 3.0             |
| Tatsuya Yoshida [26]     | retrospective            | NA                                                                                                                                                         | NA                                                                          | version 4.0             |
| Quan, Zhang [27]         | retrospective            | NA                                                                                                                                                         | NA                                                                          | version 4.0             |

CTCAE: Common Terminology Criteria for Adverse Events. NA: Not available.
